# Supplementary material for: Real-time in vivo imaging of extracellular ATP in the brain with a hybrid-type fluorescent sensor
Source: eLife journal article supplement (doi:10.7554/elife.57544), 2020-07-10
Supplement: supp [file elife-57544-supp-v1.zip]

Archive with 9 entries (9 files):
- elife_poa_e57544_Transparent_Reporting_File.pdf
- elife_poa_e57544_Figure_3_video_1.avi
- elife_poa_e57544_Figure_3_video_2.avi
- elife_poa_e57544_Figure_4_video_1.avi
- elife_poa_e57544_Figure_4_video_2.avi
- elife_poa_e57544_Figure_1_figure_supplement_1.jpg
- elife_poa_e57544_Figure_2_figure_supplement_1.jpg
- elife_poa_e57544_Figure_3_figure_supplement_1.jpg
- elife_poa_e57544_Figure_4_figure_supplement_1.jpg
