# Supplementary figures and images for: Real-time in vivo imaging of extracellular ATP in the brain with a hybrid-type fluorescent sensor
Source: eLife journal article supplement (doi:10.7554/elife.57544), 2020-07-10

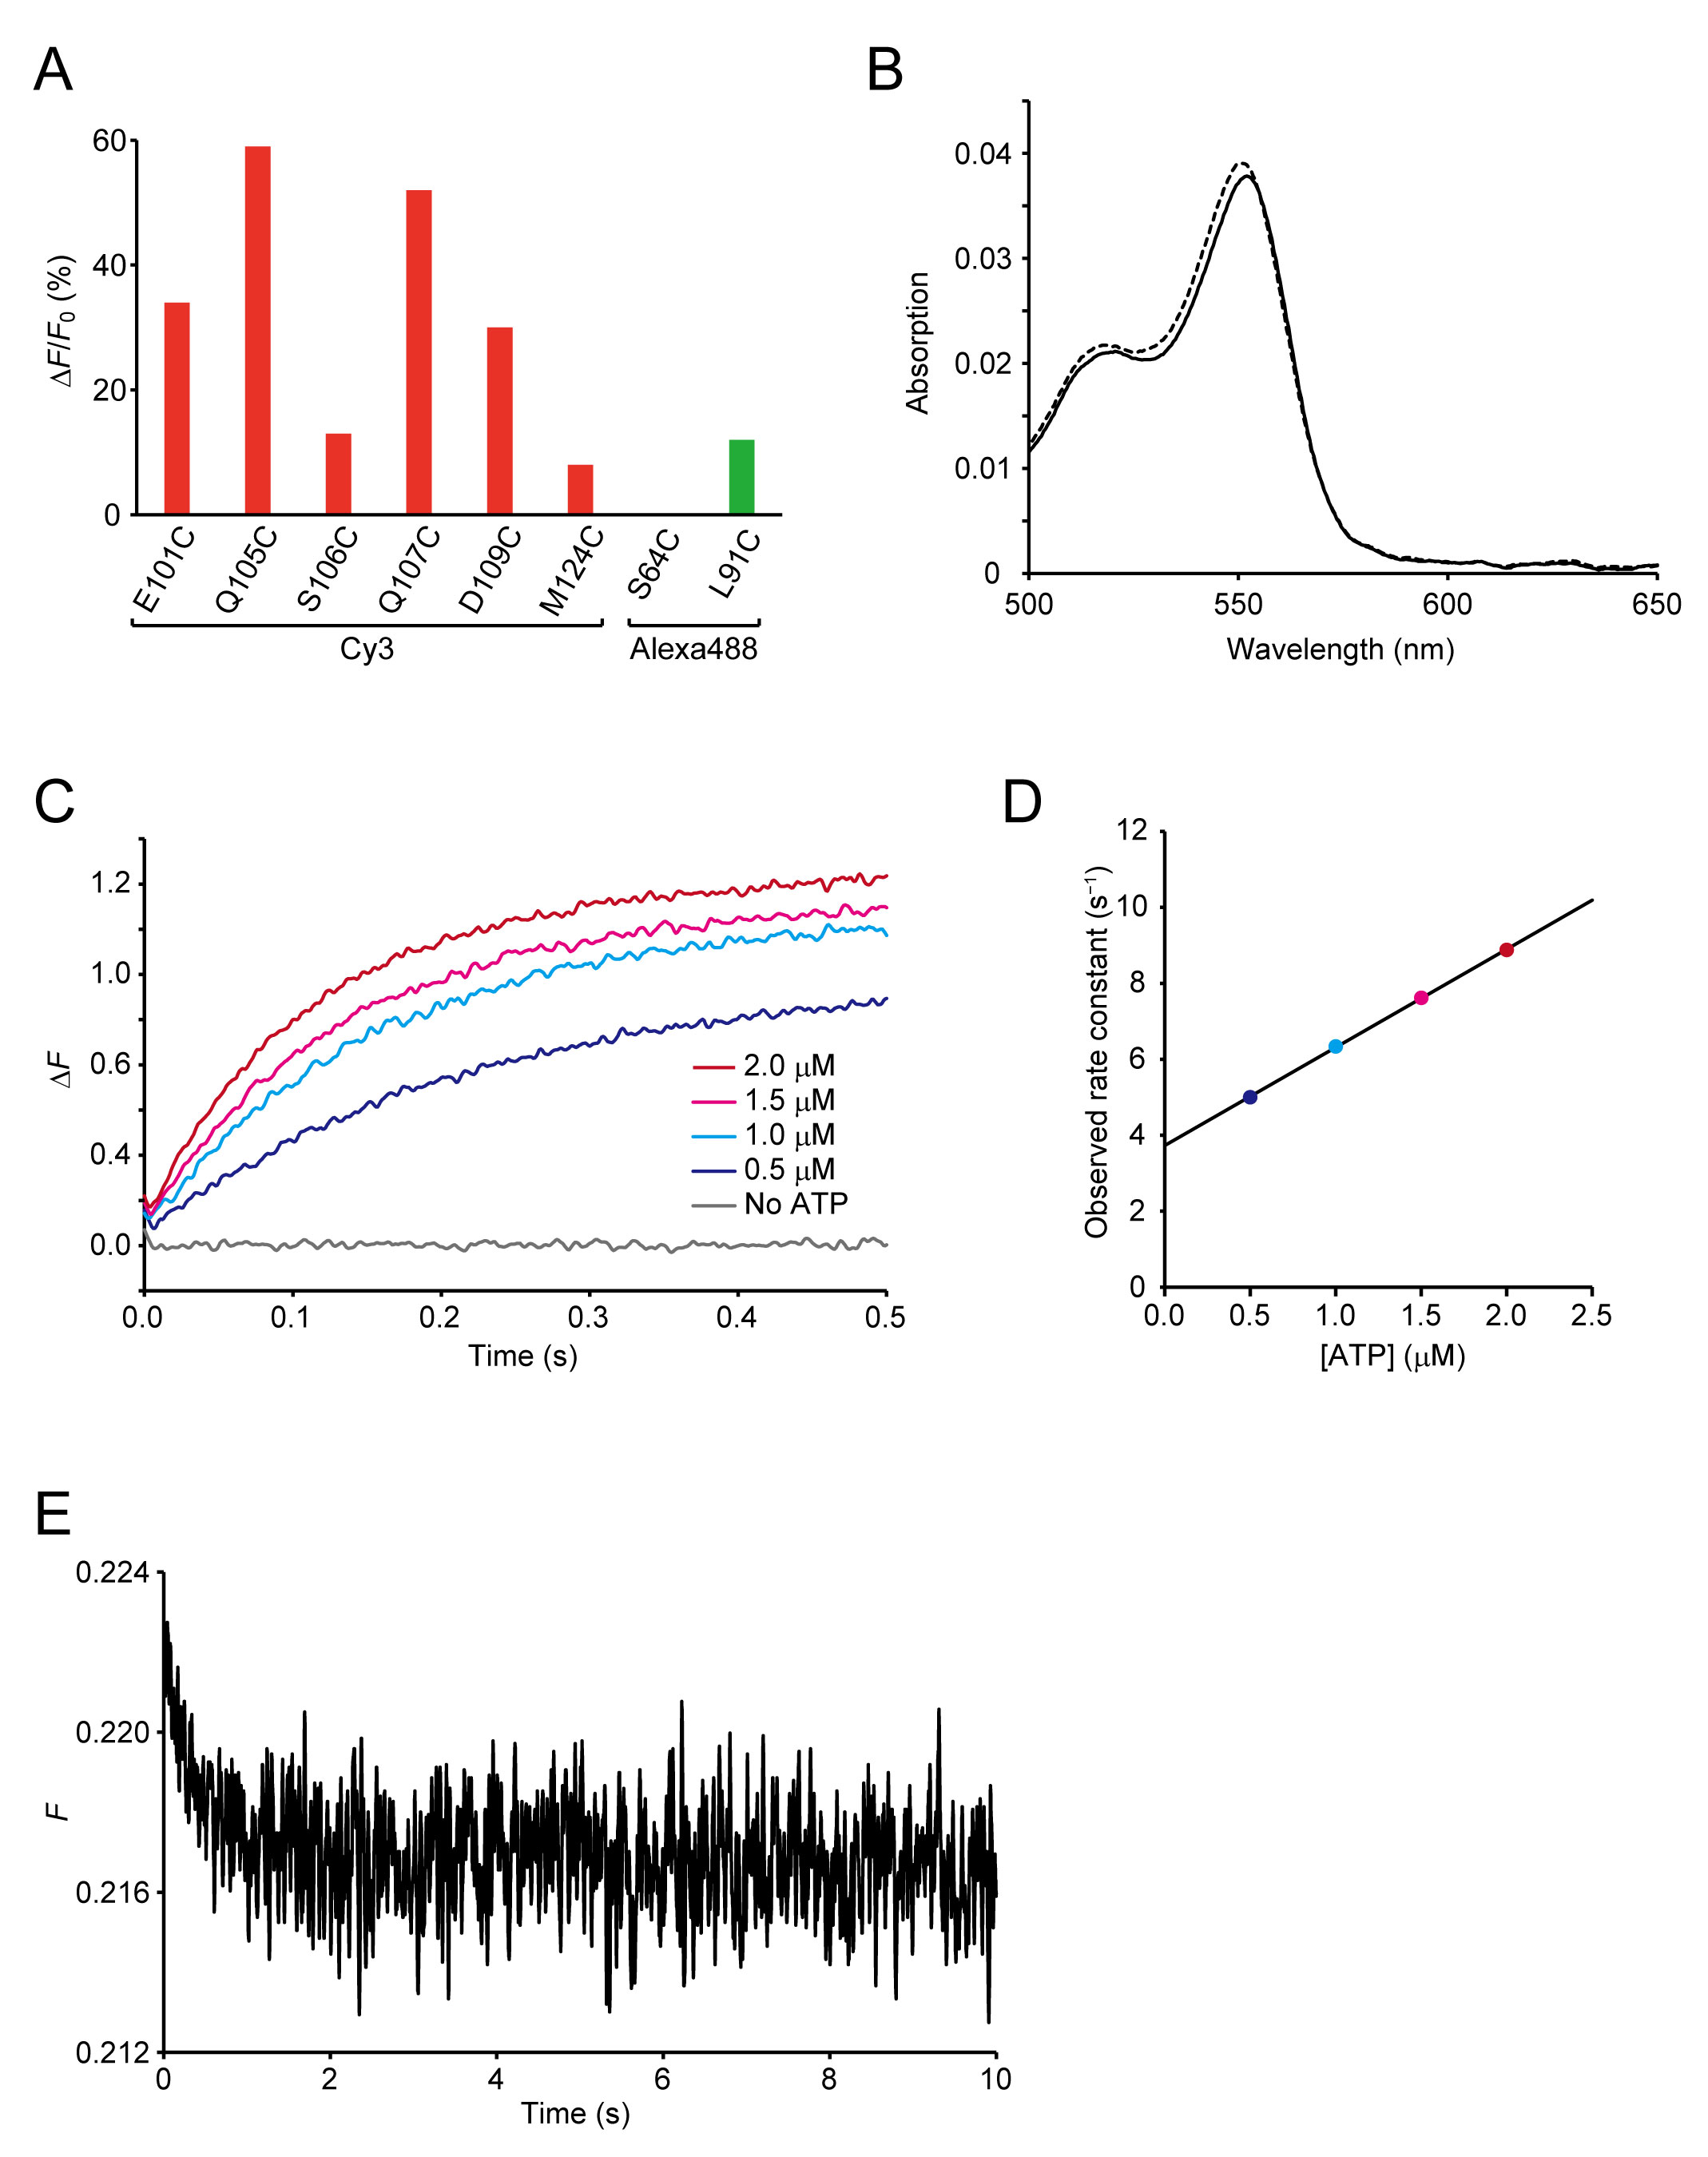

Supplement: supp [file elife-57544-supp-v1.zip › elife_poa_e57544_Figure_1_figure_supplement_1.jpg]

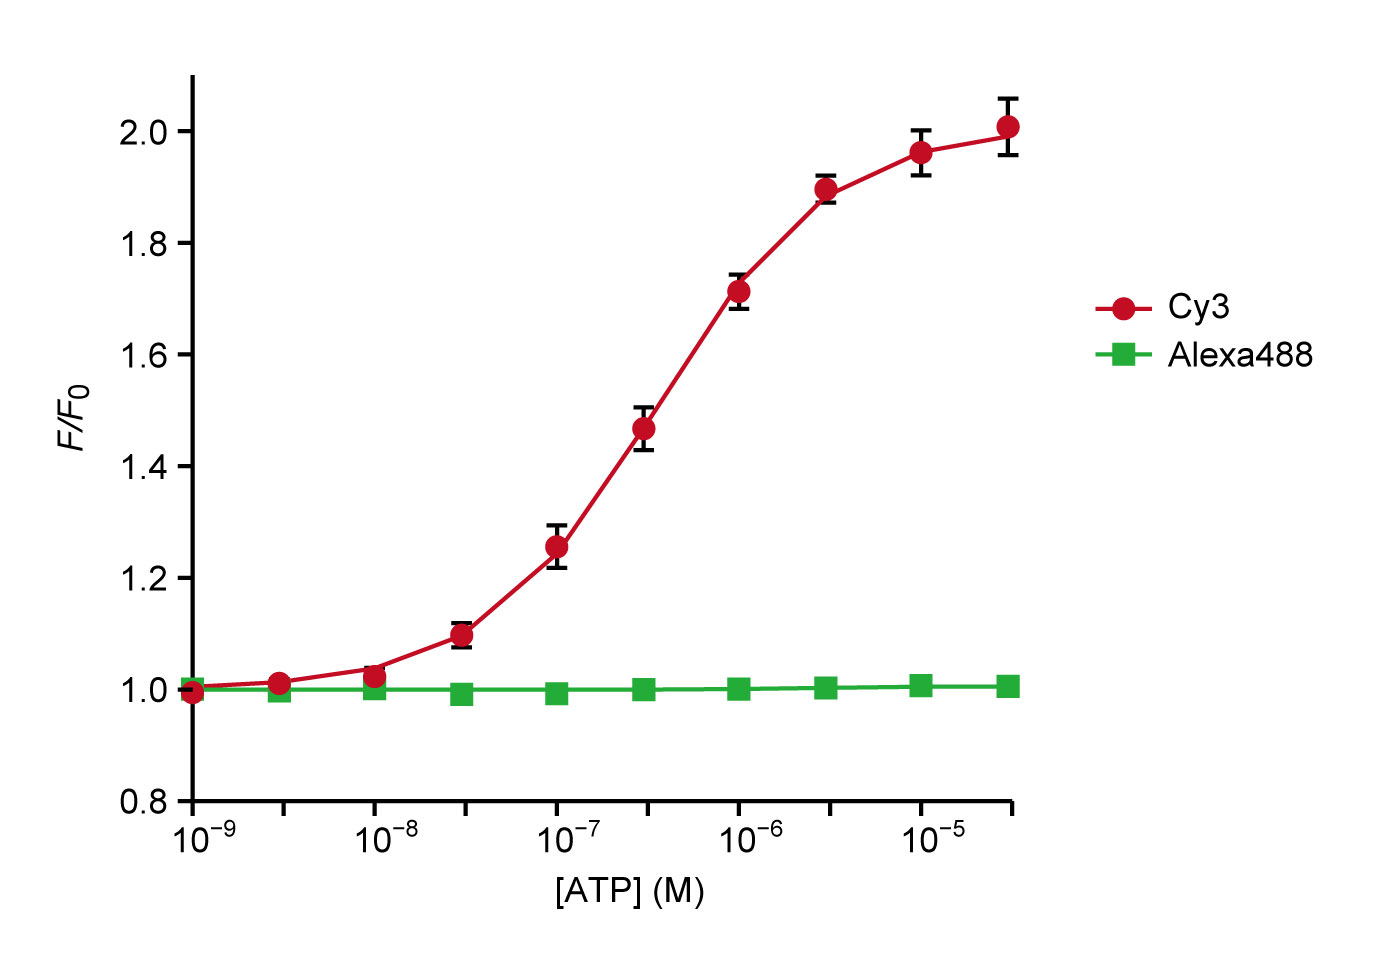

Supplement: supp [file elife-57544-supp-v1.zip › elife_poa_e57544_Figure_2_figure_supplement_1.jpg]

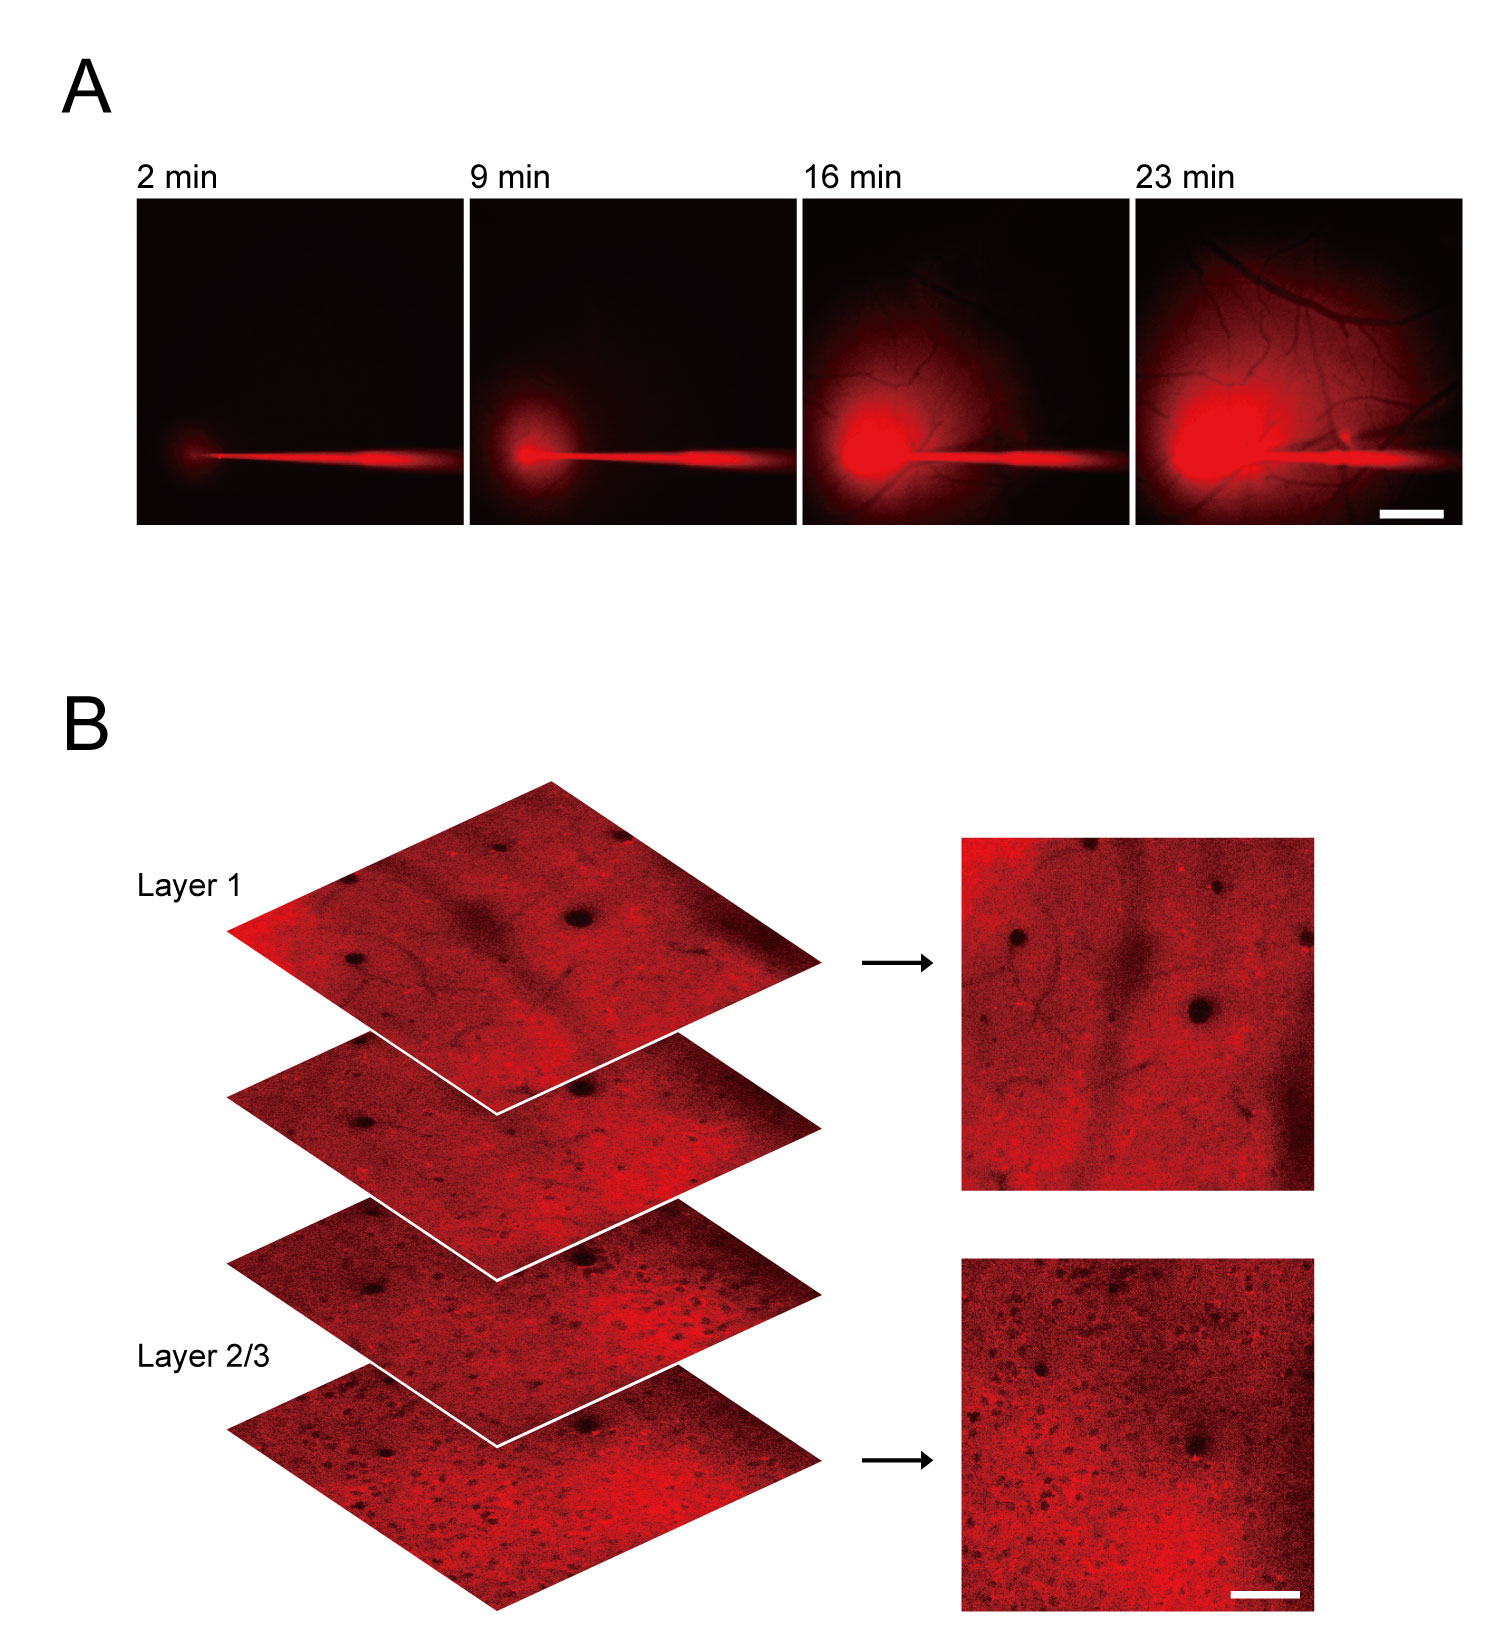

Supplement: supp [file elife-57544-supp-v1.zip › elife_poa_e57544_Figure_3_figure_supplement_1.jpg]

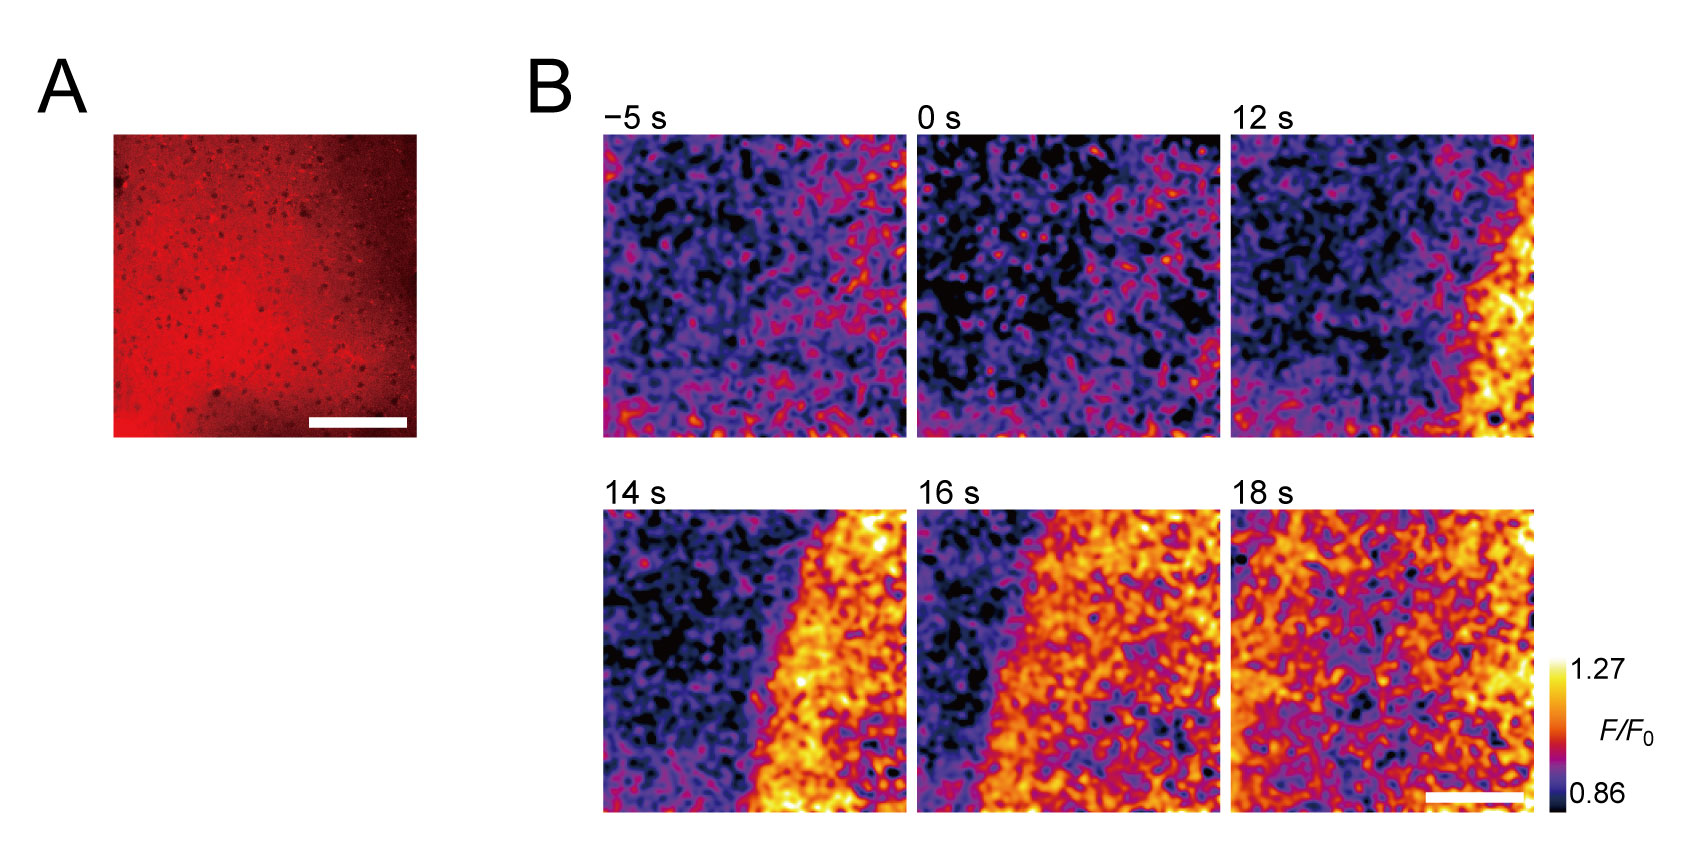

Supplement: supp [file elife-57544-supp-v1.zip › elife_poa_e57544_Figure_4_figure_supplement_1.jpg]
